# Supplementary material for: Water Quality, Toxicity and Diversity of Planktonic and Benthic Cyanobacteria in Pristine Ancient Lake Khubsugul (Hövsgöl), Mongolia
Source: MDPI journal article supplement (doi:10.3390/toxins15030213), 2023-03-10
Supplement: s1 [file s1]

## Water Quality, Toxicity and Diversity of Planktonic and Benthic Cyanobacteria in Pristine Ancient Lake Khubsugul (Hövsgöl), Mongolia

Olga I. Belykh <sup>1\*</sup>, Ekaterina G. Sorokovikova <sup>1\*</sup>, Irina V. Tomberg <sup>1</sup>, Galina A. Fedorova <sup>1</sup>, Anton V. Kuzmin <sup>1</sup>, Andrey Yu. Krasnopeev <sup>1</sup>, Mariya Yu. Suslova <sup>1</sup>, Sergey A. Potapov <sup>1</sup>, Tatiana I. Belykh <sup>2</sup>, Jadambaa Norovsuren <sup>3</sup>, Agnia D. Galachyants <sup>1</sup>, Irina V. Tikhonova <sup>1</sup>

**Table S1.** Cyanobacteria species composition, abundance and biomass in biofilms on stones (n=8) from Lake Khubsugul.

| Species                         | Abundance, Ind. m <sup>-2</sup> |         | Biomass, g m <sup>-2</sup> |      |
|---------------------------------|---------------------------------|---------|----------------------------|------|
|                                 | Mean                            | SD      | Mean                       | SD   |
| <i>Rivularia coadunata</i>      | 58115942                        | 5039303 | 4407                       | 303  |
| <i>Leptolyngbya</i> sp.         | 17758152                        | 3481410 | 3                          | 0,49 |
| <i>Nostoc</i> sp.               | 5448370                         | 2431507 | 157                        | 70   |
| <i>Chamaesiphon subglobosus</i> | 851449                          | 224186  | 0,02                       | 0,01 |
| Total                           | 81580616                        | 6415337 | 4566                       | 319  |

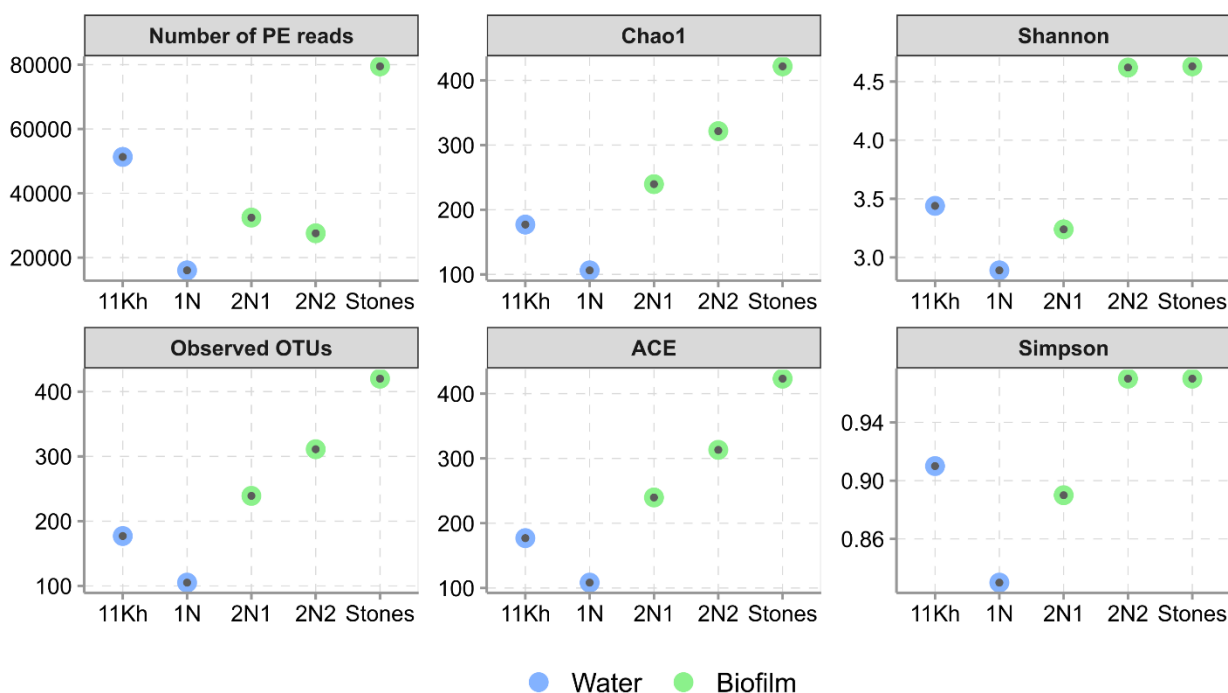

**Figure S1.** Number of pair-end reads, OTUs, and alpha-diversity indices for bacterial communities in the samples from Lake Khubsugul.

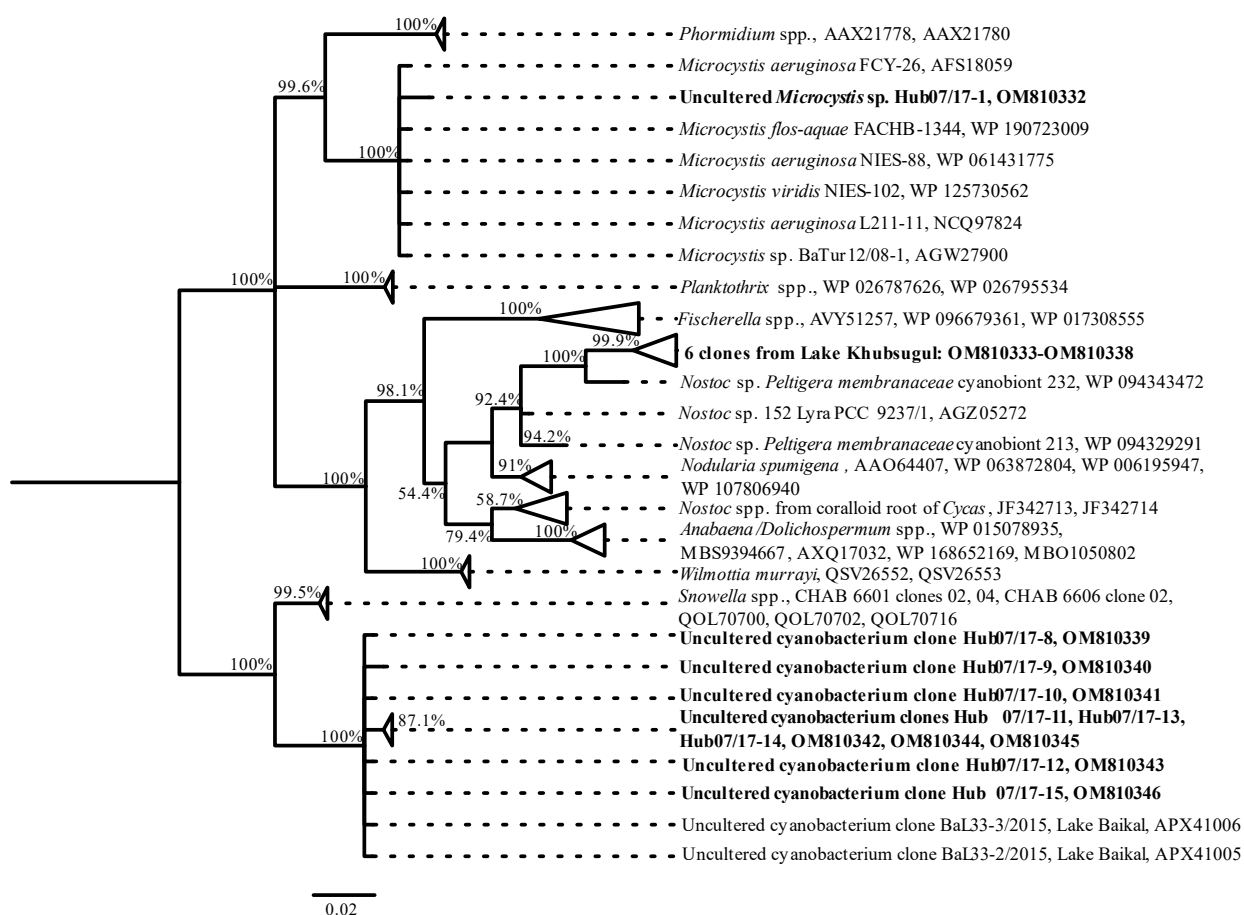

**Figure S2.** Unrooted phylogenetic tree obtained with MrBayes based on the alignment of *mcvE* gene sequences of cyanobacteria. Sequences from Lake Khubsugul are in bold. Bayesian posterior probabilities are indicated near their nodes. The scale bar shows 0.02 estimated substitutions per site.

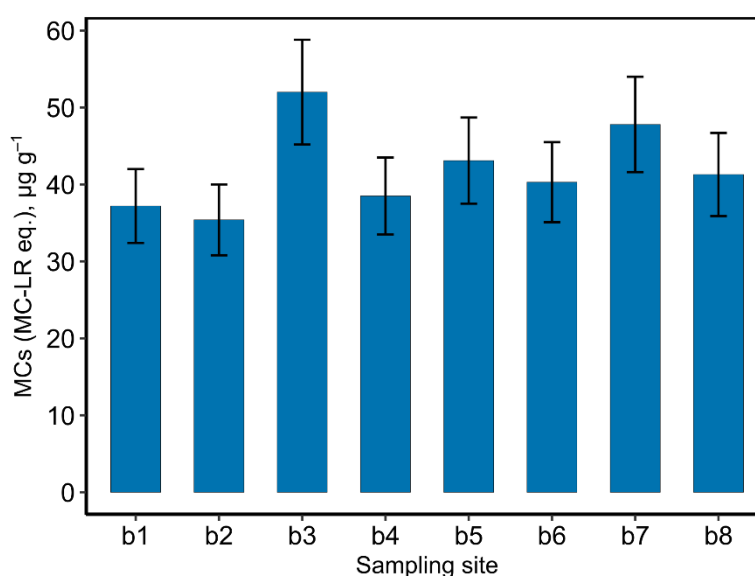

**Figure S3.** Total MC concentration detected by ELISA in biofilms from stony substrates sampled in the coastal zone near Khankh settlement (st. "Stones"). Error bars represent standard deviation.

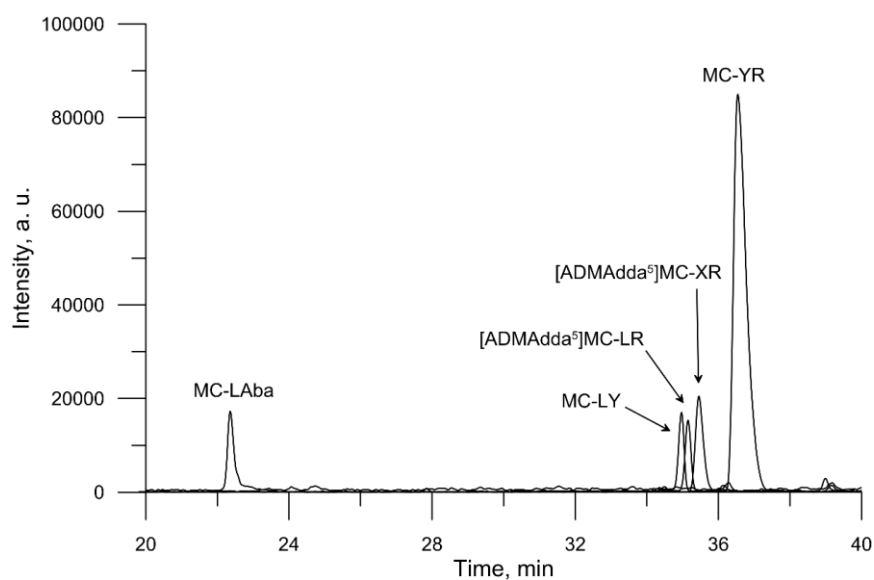

**Figure S4.** Extracted ion current chromatogram of microcystins from the Lake Khubsugul, integrated sample "Stones".

**Table S2.** Faecal indicator microorganisms in the water from Lake Khubsugul sampled on 11 to 14 July 2017.

| No | Sample     | Total coliforms, CFU in 100 ml | Thermotolerant coliforms, CFU in 100 ml | <i>E. coli</i> , CFU in 100 ml | Enterococci, CFU in 100 ml | Coliphages, PFU in 100 ml |
|----|------------|--------------------------------|-----------------------------------------|--------------------------------|----------------------------|---------------------------|
| 1  | 1H, 0 m    | 0                              | 0                                       | 0                              | 4 ± 1                      | 0                         |
| 2  | 2H, 0 m    | 5 ± 1                          | 4 ± 0                                   | 4 ± 0                          | 6 ± 0                      | 0                         |
| 3  | 3H, 0 m    | 1 ± 0                          | 1 ± 0                                   | 1 ± 0                          | 0                          | 0                         |
| 4  | 4H, 0 m    | 0                              | 0                                       | 0                              | 1 ± 0                      | 0                         |
| 5  | 5H, 0 m    | 54 ± 2                         | 0                                       | 0                              | 2 ± 0                      | 0                         |
| 6  | 6H, 0 m    | 2 ± 1                          | 2 ± 1                                   | 2 ± 1                          | 1 ± 0                      | 0                         |
| 7  | 7H, 0 m    | 0                              | 0                                       | 0                              | 0                          | 0                         |
| 8  | 8H, 0 m    | 2 ± 1                          | 2 ± 1                                   | 2 ± 1                          | 0                          | 0                         |
| 9  | 9H, 0 m    | 24 ± 2                         | 0                                       | 0                              | 0                          | 0                         |
| 10 | 10H, 0 m   | 0                              | 0                                       | 0                              | 0                          | 0                         |
| 11 | 1N, 0 m    | 0                              | 0                                       | 0                              | 0                          | 0                         |
| 12 | 1N, 5 m    | 0                              | 0                                       | 0                              | 0                          | 0                         |
| 13 | 1N, 10 m   | 0                              | 0                                       | 0                              | 0                          | 0                         |
| 14 | 1N, 15 m   | 0                              | 0                                       | 0                              | 0                          | 0                         |
| 15 | 1N, 25 m   | 0                              | 0                                       | 0                              | 0                          | 0                         |
| 16 | 11Kh, 0 m  | 0                              | 0                                       | 0                              | 2 ± 1                      | 0                         |
| 17 | 11Kh, 5 m  | 0                              | 0                                       | 0                              | 0                          | 0                         |
| 18 | 11Kh, 10 m | 0                              | 0                                       | 0                              | 2 ± 1                      | 0                         |
| 19 | 11Kh, 15 m | 2 ± 1                          | 2 ± 1                                   | 2 ± 1                          | 0                          | 0                         |
| 20 | 11Kh, 25 m | 2 ± 1                          | 2 ± 1                                   | 2 ± 1                          | 0                          | 0                         |

Note: CFU – colony-forming units; PFU – plaque-forming units.

**Table S3.** Guideline values of water safety indicators in surface water according to normative documents of the Russian Federation [68–70].

| Water use category | Total coliforms, CFU in 100 ml | Thermotolerant coliforms, CFU in 100 ml | <i>E. coli</i> , CFU in 100 ml | Enterococci, CFU in 100 ml | Coliphages, PFU in 100 ml |
|--------------------|--------------------------------|-----------------------------------------|--------------------------------|----------------------------|---------------------------|
| Category I         | ≤ 1000                         | ≤ 100                                   | ≤ 100                          | ≤ 100                      | ≤ 10                      |
| Category II        | ≤ 500                          | ≤ 100                                   | ≤ 100                          | ≤ 10                       | ≤ 10                      |

Note: CFU – colony-forming units; PFU – plaque-forming units.

**Table S4.** Results for Kruskal-Wallis test based on depth factor dependence.

| Factor                    | n  | statistic | df | p.adj   | p.adj.signif |
|---------------------------|----|-----------|----|---------|--------------|
| Ec_25°C                   | 20 | 16.729    | 4  | 0.00218 | **           |
| Si                        | 20 | 10.271    | 4  | 0.0361  | *            |
| N <sub>org</sub>          | 20 | 17.414    | 4  | 0.00161 | **           |
| TN                        | 20 | 16.484    | 4  | 0.00243 | **           |
| DIP                       | 20 | 17.386    | 4  | 0.00163 | **           |
| P <sub>org</sub>          | 20 | 16.171    | 4  | 0.0028  | **           |
| TP                        | 20 | 16.514    | 4  | 0.0024  | **           |
| COD <sub>Cr</sub>         | 20 | 18.286    | 4  | 0.00109 | **           |
| COD <sub>Mn</sub>         | 20 | 10.529    | 4  | 0.0324  | *            |
| Chl_a                     | 20 | 11.143    | 4  | 0.025   | *            |
| Cyclotella_ocellata_A     | 20 | 17.513    | 4  | 0.00154 | **           |
| Mychonastes_minusculus_A  | 20 | 13.900    | 4  | 0.00762 | **           |
| Dinobryon_sociale_A       | 20 | 13.657    | 4  | 0.00847 | **           |
| Monoraphidium_contortum_A | 20 | 11.037    | 4  | 0.0262  | *            |
| Others_A                  | 20 | 14.314    | 4  | 0.00636 | **           |
| Total_A                   | 20 | 17.171    | 4  | 0.00179 | **           |
| Cyclotella_ocellata_B     | 20 | 17.513    | 4  | 0.00154 | **           |
| Mychonastes_minusculus_B  | 20 | 13.910    | 4  | 0.00759 | **           |
| Dinobryon_sociale_B       | 20 | 13.657    | 4  | 0.00847 | **           |
| Monoraphidium_contortum_B | 20 | 10.829    | 4  | 0.0286  | *            |
| Others_B                  | 20 | 15.953    | 4  | 0.00308 | **           |
| Total_B                   | 20 | 13.657    | 4  | 0.00847 | **           |

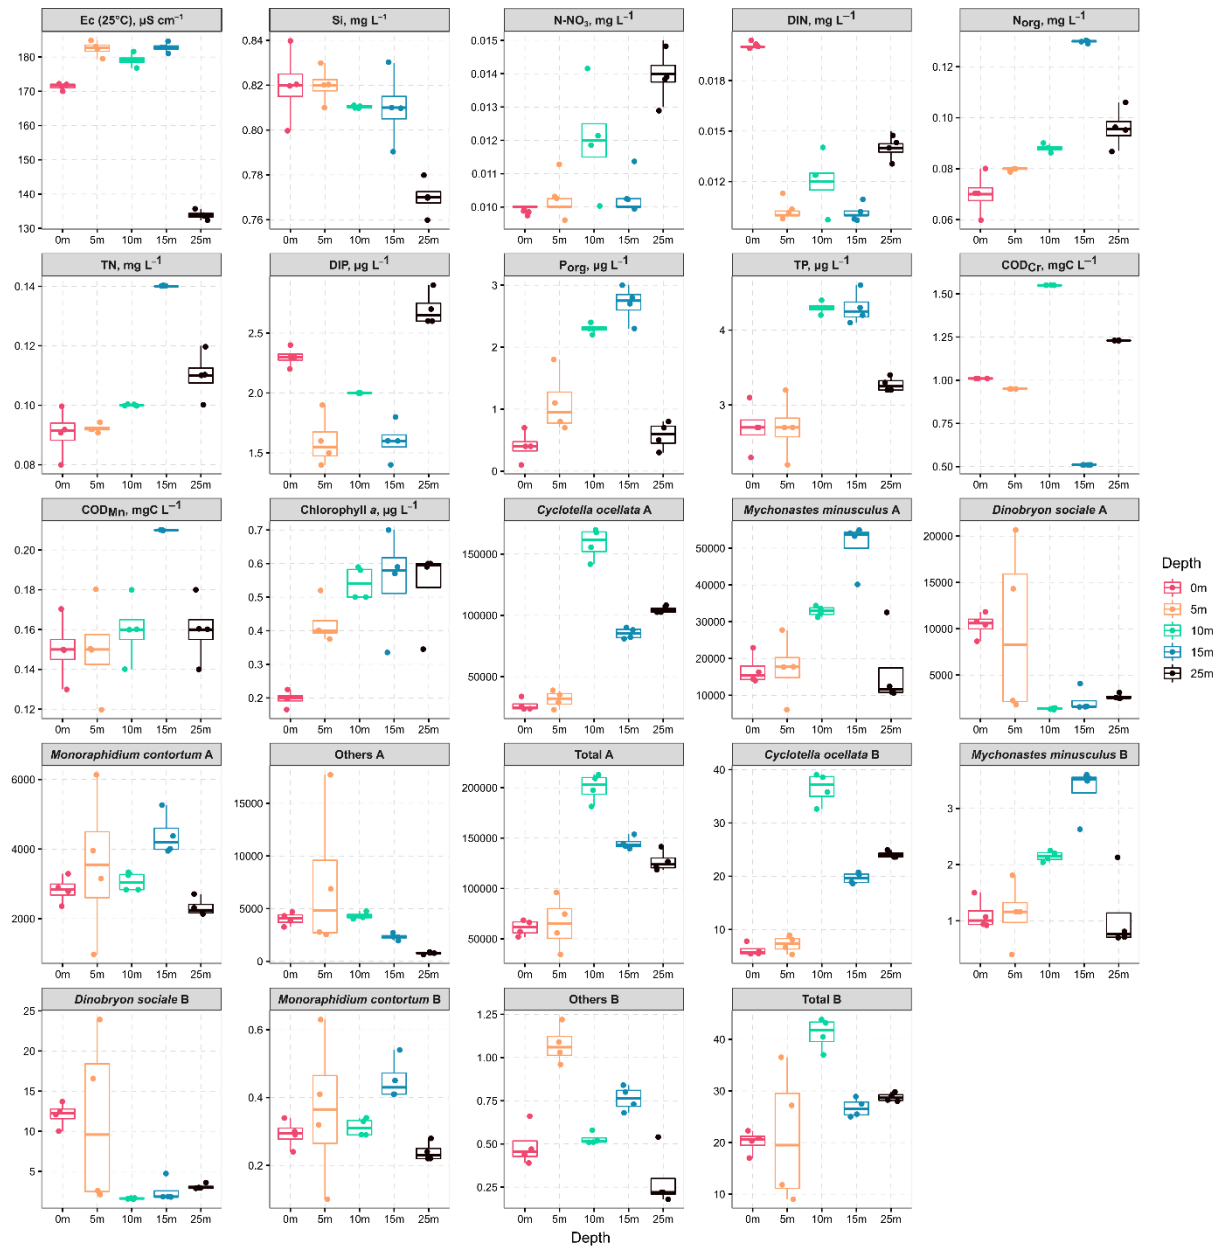

**Figure S5.** Boxplots for nutrient concentrations in different depth water layers in Lake Khubsugul. Non-parametric Kruskal-Wallis test was executed to assess if there is any significant difference between the average nutrient concentrations in different depth layers of water. Abbreviations: A – abundance, B – biomass.
